# Supplementary material for: Highly Efficient and Specific Genome Editing in Silkworm Using Custom TALENs
Source: PLOS journal article supplement (doi:10.1371/journal.pone.0045035), 2012-09-18
Supplement: S3 (10.1371/journal.pone.0045035.s003) [file journal.pone.0045035.s003]

**Table S1** Microinjection of TALEN mRNA into the embryo of Nistari.

| <b>TALENs</b> | <b>Concn.</b> | <b>Injected (strain)</b> | <b>Hatched</b> | <b>5th larvae (mosaic)</b> | <b>Mosaic Frequency</b> | <b>Mosaic Pupae (♂)</b> | <b>G1 broods (positive)</b> | <b>Germline Frequency</b> | <b>Positive larvae</b> | <b>Positive pupae (♂)</b> |
|---------------|---------------|--------------------------|----------------|----------------------------|-------------------------|-------------------------|-----------------------------|---------------------------|------------------------|---------------------------|
| B2            | 700 ng/ul     | 968 (Nistari)            | 225            | 144(66)                    | 0.46                    | 26(12)                  | 29(9)                       | 0.31                      | 630                    | 104(21)                   |
| B3            | 700 ng/ul     | 521 (Nistari)            | 101            | 52(14)                     | 0.27                    |                         | 14(2)                       | 0.14                      |                        |                           |
| B3            | 400 ng/ul     | 331 (Nistari)            | 69             | 53(12)                     | 0.23                    | 9(7)                    | 18(2)                       | 0.11                      | 277                    | 85(7)                     |
| B3            | 200 ng/ul     | 299 (Nistari)            | 35             | 21(2)                      | 0.10                    |                         | 9(2)                        | 0.22                      |                        |                           |
| B2+B3         | 350 ng/ul     | 326 (Nistari)            | 51             | 40(8)                      | 0.20                    | 5(2)                    | 14(2)                       | 0.14                      | 132                    | 4(0)                      |

TALENs were injected into the embryos of silkworm as mRNA. The percentages shown in the sixth and ninth columns were derived using the numbers in the column to the left. The numbers in the “()” were used as numerator and the numbers to the left were used as denominator.
